# Supplementary material for: Identification of non-classical hCA XII inhibitors using combination of computational approaches for drug design and discovery
Source: Sci Rep. 2021 Jul 30;11:15516. doi: 10.1038/s41598-021-94809-x (PMC8324906; doi:10.1038/s41598-021-94809-x)
Supplement: Supplementary file 1 — Supplementary Table S1 [file 41598_2021_94809_MOESM1_ESM.xlsx]

## Sheet: Лист1
Table S1. Clusterization of 135 active compounds for ligand-based pharmacaphore model generation.
Name	Conformations	Cluster ID	Cluster size
74766009	147	14	92
66824	1	14	92
74766010	146	14	92
112499924	4	14	92
118710606	104	14	92
118710598	89	14	92
118710605	91	14	92
118710602	99	14	92
118710599	96	14	92
118710600	88	14	92
118710601	96	14	92
118710604	162	14	92
22784	2	14	92
118710603	154	14	92
127052901	24	14	92
127052276	24	14	92
71578640	19	14	92
2357187	4	14	92
1070922	34	14	92
17371280	18	14	92
17371576	8	14	92
2520594	20	14	92
24416843	19	14	92
1070933	21	14	92
122185245	14	14	92
8866559	37	14	92
71578500	20	14	92
8281641	26	14	92
5765787	24	14	92
60582	18	14	92
10018880	6	14	92
4578038	112	14	92
11680415	4	14	92
3970972	69	14	92
44395685	12	14	92
96876	2	14	92
11660633	200	14	92
71764826	200	14	92
2496330	177	14	92
3998	1	14	92
72894	2	14	92
118716501	107	14	92
71602412	12	14	92
323350	8	14	92
71602411	17	14	92
71602476	8	14	92
71602410	6	14	92
73347324	8	14	92
71602538	8	14	92
42609905	61	14	92
56676517	170	14	92
5155717	14	14	92
127044834	18	14	92
4158561	19	14	92
127044999	18	14	92
127044835	19	14	92
127043469	15	14	92
2470552	15	14	92
127044664	16	14	92
127044997	16	14	92
1945421	18	14	92
127044665	14	14	92
127044252	15	14	92
71570661	6	14	92
351361	2	14	92
1211700	3	14	92
702292	3	14	92
4583704	2	14	92
746816	2	14	92
79611	2	14	92
13177311	2	14	92
73350410	2	14	92
71602539	2	14	92
742873	4	14	92
3586494	2	14	92
1124687	2	14	92
127025300	4	14	92
127025593	6	14	92
43342481	28	14	92
118729473	22	14	92
127029568	6	14	92
60155120	87	14	92
122707121	4	14	92
118716504	37	14	92
90645430	4	14	92
90645431	12	14	92
118716503	5	14	92
90645424	4	14	92
90645425	4	14	92
90645429	3	14	92
136607461	21	14	92
136607460	10	14	92
43468983	34	13	18
137062187	92	13	18
137226384	60	13	18
137226400	8	13	18
137226399	7	13	18
137226402	8	13	18
137226375	8	13	18
137226420	12	13	18
137226401	8	13	18
71764401	82	13	18
71764612	28	13	18
822776	14	13	18
71764609	26	13	18
71764613	54	13	18
11851424	6	13	18
71765042	74	13	18
1986	6	13	18
71765041	110	13	18
127035860	200	12	2
127034999	64	12	2
122184935	33	11	4
122184933	21	11	4
122184896	53	11	4
122184936	35	11	4
71718249	2	10	4
71718856	4	10	4
21726402	200	10	4
132938107	8	10	4
90645415	4	9	4
118716499	120	9	4
118716502	200	9	4
118716500	97	9	4
127050457	200	8	2
127050777	169	8	2
53389268	24	7	3
118711623	14	7	3
118711622	10	7	3
76310148	200	6	1
102341119	63	5	1
60201578	200	4	1
127050456	200	3	1
11974562	133	2	1
132819872	68	1	1
